# Supplementary material for: Measuring wool cortisol and progesterone levels in breeding maiden Australian merino sheep (Ovis aries)
Source: PLoS One. 2019 Apr 8;14(4):e0214734. doi: 10.1371/journal.pone.0214734 (PMC6453452; doi:10.1371/journal.pone.0214734)
Supplement: S1 Table — (XLSX) [file pone.0214734.s001.xlsx]

## Sheet: S1 Table
Ooronok Wool Samples
Tube #	Wool Sample #	Date Collected	Event	Weight of Sample (grams)	Date Wool Sample weighed		WCM (ng/g)		WPM (ng/g)
134	44	2017-01-01	2nd searing	0.051	2018-04-12		1.89		0.05
135	3	2017-01-01	2nd searing	0.049	2018-04-12		1.55		0.09
136	24	2017-01-01	2nd searing	0.052	2018-04-12		0.67		0.06
137	7	2017-01-01	2nd searing	0.05	2018-04-12		1.9		0.08
138	22	2017-01-01	2nd searing	0.051	2018-04-12		0.69		0.06
139	4	2017-01-01	2nd searing	0.049	2018-04-12		1.78		0.07
140	12	2017-01-01	2nd searing	0.052	2018-04-12		0.76		0.02
141	25	2017-01-01	2nd searing	0.051	2018-04-12		0.65		0.04
142	31	2017-01-01	2nd searing	0.051	2018-04-12		1.66		0.03
143	23	2017-01-01	2nd searing	0.05	2018-04-12		1.55		0.01
144	28	2017-01-01	2nd searing	0.05	2018-04-12		1.57		0.05
145	30	2017-01-01	2nd searing	0.051	2018-04-12		1.67		0.03
146	50	2017-01-01	2nd searing	0.052	2018-04-12		1.58		0.04
147	45	2017-01-01	2nd searing	0.052	2018-04-12		1.88		0.07
148	40	2017-01-01	2nd searing	0.05	2018-04-12		1.65		0.03
149	2	2017-01-01	2nd searing	0.051	2018-04-12		0.78		0.04
150	21	2017-01-01	2nd searing	0.052	2018-04-12		0.44		0.02
1	333	2017-09-16	Crutching	0.051	2018-02-21		2.9		5.7
2	57	2017-09-16	Crutching	0.0503	2018-02-21		3.2		6.8
3	53	2017-09-16	Crutching	0.0507	2018-02-21		4.3		5.9
4	46	2017-09-16	Crutching	0.0504	2018-02-21		3.9		6.2
5	8	2017-09-16	Crutching	0.05	2018-02-21		2.3		7.3
6	21	2017-09-16	Crutching	0.0512	2018-02-21		2.9		4.5
7	50	2017-09-16	Crutching	0.051	2018-02-21		3.5		5.5
8	23	2017-09-16	Crutching	0.0508	2018-02-21		4.4		5.9
9	20	2017-09-16	Crutching	0.0513	2018-02-21		3.1		5.1
10	25	2017-09-16	Crutching	0.051	2018-02-21		2.6		4.5
11	5	2017-09-16	Crutching	0.0509	2018-02-21		3.7		7.4
12	51	2017-09-16	Crutching	0.05	2018-02-21		1.8		5.4
13	24	2017-09-16	Crutching	0.0504	2018-02-21		4.5		5.7
14	26	2017-09-16	Crutching	0.0504	2018-02-21		3.1		4.9
15	47	2017-09-16	Crutching	0.0511	2018-02-21		3.9		4.4
16	60	2017-09-16	Crutching	0.0502	2018-02-21		3		4.1
17	32	2017-09-16	Crutching	0.0507	2018-02-21		2.8		3.9
18	18	2017-09-16	Crutching	0.051	2018-03-02		1.2		5.6
19	12	2017-09-16	Crutching	0.0512	2018-03-02		5.4		6.7
20	41	2017-09-16	Crutching	0.05	2018-03-02		4.5		6.1
21	31	2017-09-16	Crutching	0.0509	2018-03-02		4.1		5.6
22	22	2017-09-16	Crutching	0.0501	2018-03-02		4.8		6.3
23	29	2017-09-16	Crutching	0.0497	2018-03-02		3.7		6.1
24	10	2017-09-16	Crutching	0.0505	2018-03-02		3.9		5.2
25	30	2017-09-16	Crutching	0.0505	2018-03-02		3.6		5.4
26	40	2017-09-16	Crutching	0.0495	2018-03-02		3.3		5.1
27	39	2017-09-16	Crutching	0.0515	2018-03-02		3.5		6.2
28	25	2017-09-16	Crutching	0.0506	2018-03-02		3.2		4.3
29	44	2017-09-16	Crutching	0.0494	2018-03-02		3.9		4.9
30	3	2017-09-16	Crutching	0.0514	2018-03-02		3.1		4.2
31	38	2017-09-16	Crutching	0.0498	2018-03-02		4.3		3.9
32	4	2017-09-16	Crutching	0.0508	2018-03-02		4.6		4.1
33	6	2017-09-16	Crutching	0.0515	2018-03-02		4.8		5.2
34	2	2017-09-16	Crutching	0.0501	2018-03-02		4.1		5.5
35	56	2017-09-16	Crutching	0.0499	2018-03-02		4.6		5.2
36	28	2017-09-16	Crutching	0.0509	2018-03-06		4.5		5.8
37	43	2017-09-16	Crutching	0.0514	2018-03-07		3.3		5.5
38	59	2017-09-16	Crutching	0.0509	2018-03-08		3.6		5.2
39	58	2017-09-16	Crutching	0.0507	2018-03-09		3.8		5
40	34	2017-09-16	Crutching	0.05	2018-03-10		2.9		6.5
41	49	2017-09-16	Crutching	0.0499	2018-03-11		2.7		7.3
42	7	2017-09-16	Crutching	0.0502	2018-03-12		3.5		6.6
43	48	2017-09-16	Crutching	0.0508	2018-03-13		4.5		5.3
44	1	2017-09-16	Crutching	0.0504	2018-03-14		4.8		5.4
45	27	2017-09-16	Crutching	0.0511	2018-03-15		1.9		6.7
46	3	2017-09-16	Crutching	0.0514	2018-03-16		3.5		6.8
47	19	2017-09-16	Crutching	0.0515	2018-03-17		3.3		5.1
88	29	2017-12-09	Top Knot Shearing	0.0511	2018-03-29		1.9		0.03
89	34	2017-12-09	Top Knot Shearing	0.05	2018-03-29		3.2		0.02
90	38	2017-12-09	Top Knot Shearing	0.0501	2018-03-29		4.3		0.05
91	18	2017-12-09	Top Knot Shearing	0.0503	2018-03-29		3.9		0.01
92	57	2017-12-09	Top Knot Shearing	0.0507	2018-03-29		2.3		0.08
93	53	2017-12-09	Top Knot Shearing	0.0503	2018-03-29		2.9		0.09
94	58	2017-12-09	Top Knot Shearing	0.0512	2018-03-29		3.5		0.1
95	8	2017-12-09	Top Knot Shearing	0.0512	2018-03-29		4.4		0.06
96	4	2017-12-09	Top Knot Shearing	0.0504	2018-03-29		3.1		0.08
97	10	2017-12-09	Top Knot Shearing	0.0516	2018-03-29		2.6		0.07
98	50	2017-12-09	Top Knot Shearing	0.0502	2018-03-29		3.7		0.09
99	12	2017-12-09	Top Knot Shearing	0.0514	2018-03-29		1.8		0.1
100	45	2017-12-09	Top Knot Shearing	0.0515	2018-03-29		2.5		0.05
101	7	2017-12-09	Top Knot Shearing	0.0504	2018-03-29		3.1		0.08
102	30	2017-12-09	Top Knot Shearing	0.0517	2018-03-29		1.6		0.09
103	27	2017-12-09	Top Knot Shearing	0.0504	2018-03-29		3		0.05
104	49	2017-12-09	Top Knot Shearing	0.0513	2018-03-29		2.8		0.09
105	28	2017-12-09	Top Knot Shearing	0.0498	2018-03-29		1.2		0.07
106	20	2017-12-09	Top Knot Shearing	0.0519	2018-03-29		5.4		0.04
107	47	2017-12-09	Top Knot Shearing	0.0507	2018-03-29		1.3		0.06
108	23	2017-12-09	Top Knot Shearing	0.0494	2018-03-29		1.9		0.02
109	33	2017-12-09	Top Knot Shearing	0.0509	2018-03-29		2.8		0.05
110	9	2017-12-09	Top Knot Shearing	0.0501	2018-03-29		3.7		0.01
111	6	2017-12-09	Top Knot Shearing	0.053	2018-04-05		3.9		0.08
112	16	2017-12-09	Top Knot Shearing	0.052	2018-04-05		3.6		0.1
113	25	2017-12-09	Top Knot Shearing	0.049	2018-04-05		3.3		0.05
114	24	2017-12-09	Top Knot Shearing	0.051	2018-04-05		2.1		0.06
115	41	2017-12-09	Top Knot Shearing	0.05	2018-04-05		2.3		0.07
116	59	2017-12-09	Top Knot Shearing	0.05	2018-04-05		3.9		0.04
117	43	2017-12-09	Top Knot Shearing	0.05	2018-04-05		3.1		0.03
118	1	2017-12-09	Top Knot Shearing	0.049	2018-04-05		4.3		0.07
119	39	2017-12-09	Top Knot Shearing	0.051	2018-04-05		4.6		0.07
120	21	2017-12-09	Top Knot Shearing	0.049	2018-04-05		4.8		0.04
121	51	2017-12-09	Top Knot Shearing	0.05	2018-04-05		4.1		0.03
122	22	2017-12-09	Top Knot Shearing	0.05	2018-04-05		4.6		0.07
123	51	2017-12-09	Top Knot Shearing	0.051	2018-04-05		4.5		0.04
124	44	2017-12-09	Top Knot Shearing	0.05	2018-04-05		3.3		0.02
125	32	2017-12-09	Top Knot Shearing	0.051	2018-04-05		3.6		0.08
126	37	2017-12-09	Top Knot Shearing	0.052	2018-04-05		3.8		0.09
127	26	2017-12-09	Top Knot Shearing	0.051	2018-04-05		2.9		0.07
128	50	2017-12-09	Top Knot Shearing	0.049	2018-04-05		2.7		0.02
129	5	2017-12-09	Top Knot Shearing	0.05	2018-04-05		3.5		0.06
130	42	2017-12-09	Top Knot Shearing	0.051	2018-04-05		4.5		0.08
131	46	2017-12-09	Top Knot Shearing	0.052	2018-04-05		4.8		0.09
132	54	2017-12-09	Top Knot Shearing	0.051	2018-04-05		1.9		0.04
133	60	2017-12-09	Top Knot Shearing	0.05	2018-04-05		3.5		0.05
